# Supplementary material
Source: PubMed Central journal article supplement (PMC7489382)
Supplement: jamacardiol-e203511-s002.pdf [file jamacardiol-e203511-s002.pdf]

## Supplementary Online Content

Taylor JL, Holland DJ, Keating SE, et al. Short-term and long-term feasibility, safety, and efficacy of high-intensity interval training in cardiac rehabilitation: the FITR Heart Study randomized clinical trial. *JAMA Cardiol*. Published online September 2, 2020. doi:10.1001/jamacardio.2020.3511

### **eMethods.**

**eTable 1.** Medication adjustments throughout the study period

**eTable 2.** Serious adverse events

**eTable 3.** Exercise intensity during stages 1 and 2

**eTable 4.** Adherence to exercise training protocols

**eTable 5.** Per-protocol analyses

**eTable 6.** Participant feasibility

**eTable 7.** Sensitivity analyses

**eTable 8.** Habitual physical activity and dietary intake

This supplementary material has been provided by the authors to give readers additional information about their work.

## **eMethods.**

A detailed description of the design, eligibility, and outcome measures of The FITR-Heart Study: Feasibility, safety, adherence, and efficacy of high intensity Interval Training in Rehabilitation for coronary Heart disease, has been previously published <sup>1</sup>. This trial adhered to the Helsinki Declaration and was approved by The University of Queensland and UnitingCare Health Ethics Committees. It was prospectively registered at anzctr.org.au on 26 November 2015 (identifier: ACTRN12615001292561).

### Participants

All patients presenting for CR at a single tertiary hospital (The Wesley Hospital, Brisbane, Australia) following diagnosis of CAD, acute coronary syndrome (> 4-weeks), percutaneous coronary intervention (> 3-weeks), or coronary artery bypass graft surgery (CABG) (>4-weeks) were considered for inclusion in the study. Eligible patients were invited to participate at their initial CR appointment. Inclusion criteria <sup>1</sup> included: angiographically-proven CAD (determined by the treating physician), age of 18-80 years, and eligibility to participate in the private hospital CR program. Patients were excluded from participation if they had any absolute or relative contraindications to exercise testing as per the American Heart Association guidelines <sup>2</sup>, including but not limited to: unstable angina; unstable arrhythmias, severe valvular disease; uncompensated heart failure; severe pulmonary disease; uncontrolled hypertension (systolic blood pressure > 200 mmHg and/or diastolic blood pressure >110 mmHg); chronic kidney disease (stages III-V); orthopaedic/neurological limitations; or physical impairment limiting the ability to exercise. Additionally patients will be excluded for: indicating an unwillingness to comply with one of the exercise prescriptions they may be randomised to; planned operations during the research period; drug or alcohol abuse; planning to, or participation in another intervention study; not willing to sign the consent form; and pregnancy or expecting to be pregnant during the study period.

### Randomisation

Patients were randomized 1:1 to 1) HIIT or 2) MICT (usual care), with stratification for baseline fitness level and sex. The randomised sequence was computer-generated and sealed in sequentially numbered opaque envelopes by an individual external from the investigation team. A study investigator then enrolled participants and assigned them to interventions as per the numbered envelopes.

### Study design

The study involved three stages: 1) a 4-week supervised program including two supervised and one home-based exercise training sessions per week; 2) a further 2-months of unsupervised home-based training of at least three sessions per week (with weekly support); and 3) a further 9-months of unsupervised home-based training of at least three sessions per week (with informal support only). Weekly support involved submission of exercise logs by the participant and phone/email follow-up by the study team. Study testing occurred at The University of Queensland (Brisbane, Australia) at baseline, 4-weeks, 3-months, 6-months, and 12-months.

### Exercise protocols

The HIIT protocol<sup>1,3</sup> involved 4 x 4-minute high intensity intervals corresponding to an RPE 15-18 as per Borg's rating of perceived exertion (RPE) 6-20 scale<sup>4</sup>, interspersed with 3-minutes active recovery intervals (RPE 11-13), for a total duration of 32-minutes. The MICT protocol involved usual care exercise, of 40-minutes moderate intensity exercise at an RPE 11-13<sup>11</sup>. Protocols were designed to be isocaloric as previously described<sup>1</sup>. To improve the clinical application of this research, the study focused on using subjective measures of exercise intensity (RPE), as this approach is commonly used in CR programs. Subjective measures of exercise intensity are less affected by alterations in medical therapy (i.e.  $\beta$ -blockade), and do not require re-calibration with improved levels of fitness over the study period<sup>1,3</sup>. Furthermore, objective measures of exercise intensity in CR, such as percentage of maximum heart rate (%HR<sub>max</sub>), have limited applicability for centres without access to maximal exercise testing facilities. Consequently, the CR clinicians were instructed to use RPE for individual exercise prescription and exercise was progressed gradually to maintain the desired RPE. Participants were also provided a HR range that corresponded to the respective target RPE, in order to reinforce adherence with the exercise intensity. The HR range for the HIIT group was 85-95%HR<sub>peak</sub> and 65-75%HR<sub>peak</sub> for the MICT group. Exercise intensity was recorded as average training RPE, peak training RPE, average training %HR<sub>peak</sub>, and peak training %HR<sub>peak</sub> as previously suggested<sup>3</sup>. The intensity during the recovery intervals were not monitored. To prevent overestimation of training intensity, %HR<sub>peak</sub> was calculated from the CPET with highest HR<sub>peak</sub> attained over the 12-months, unless the change in HR<sub>peak</sub> was associated with adjustments to  $\beta$ -blocker therapy. Training

HR was measured by 3-lead electrocardiography or pulse oximetry at least 10-minutes into the exercise session. In order to assess adherence to the prescribed intensity, HIIT participants were also provided with HR monitors to record their highest HR for each high intensity interval. All supervised exercise sessions were performed during standard CR exercise classes at The Wesley Hospital (Brisbane, Australia). Both HIIT and MICT groups exercised in the same class environment with a staff to patient ratio of 2:10. A variety of aerobic exercise machines were used according to participant preference or physical limitation (e.g. treadmill, cycle ergometer, elliptical machine, rowing ergometer). Home-based exercise sessions were performed by participants individually in their own environment. They were encouraged to continue with outdoor walking exercise or use personal exercise equipment in their home or commercial gym (e.g. bike, treadmill). No exercise equipment was provided with the exception of a HR monitor for the HIIT group (for stages 1 and 2) to assess whether HR achieved with home-based training was similar to supervised training. The MICT participants were not provided with HR monitors in line with the usual care approach in the CR program. Therefore, training HR was only recorded in the HIIT group during stage 2. RPE remained the primary method of exercise prescription in both groups and the ongoing feedback between the participants and the clinicians/study team was the same in both groups. During the time-frame from 3-months to 12-months neither group was provided with a HR monitor and neither group received formal feedback or support.

### Outcome measures

Detailed descriptions and methods for primary and secondary outcomes have been previously published<sup>1</sup>. For measurement of  $\text{VO}_2\text{peak}$ , maximal CPET with electrocardiogram was performed on a treadmill using an individualized protocol<sup>1</sup>. The personnel providing CPET motivation was blinded to the randomisation group.  $\text{VO}_2\text{peak}$  was determined from an average of the highest two values from 10 second epochs during the exercise test.  $\text{VO}_2\text{peak}$  (L/min) was normalized for bodyweight (expressed as mL/kg/min) to better facilitate comparison between subjects of varying body mass<sup>5</sup>. Adjustment of  $\text{VO}_2\text{peak}$  for lean body mass (expressed as mL/kg LBM/min) was also made, as adipose tissue consumes a relatively smaller amount of oxygen than muscle during exercise and normalizing for total bodyweight may be misleading in an overweight population<sup>5</sup>. Ventilatory efficiency was assessed from maximum oxygen uptake efficiency slope (OUES)<sup>6</sup>. Peak oxygen pulse ( $\text{O}_2$  pulse) was calculated as  $\text{VO}_2\text{peak}$  (mL/min) divided by peak HR ( $\text{HR}_{\text{peak}}$ )<sup>5</sup> and relative peak  $\text{O}_2$  pulse as  $\text{VO}_2\text{peak}$  (mL/kg/min) divided by  $\text{HR}_{\text{peak}}$  and multiplied by 100<sup>7</sup>. Exercise capacity in metabolic equivalents (METs) was calculated from the FRIEND registry equation using treadmill speed and grade at peak exercise<sup>8</sup>. Tri-axial accelerometers, were used to measure daily minutes spent in moderate vigorous physical activity (MVPA)  $\geq 1$ -min bouts, average daily acceleration ('ENMO')<sup>9</sup> and minimum daily acceleration for the most active 30 minutes, with open source code used for analysis<sup>9,10</sup>. For MVPA, specific thresholds were used for the wrist (100mg) or hip (70mg)<sup>11</sup>.

Safety was assessed continuously throughout the study period as frequency, type, and severity of serious adverse events (SAE's). All SAE's were referred to the study medical advisor and patient's physician, with simultaneous referral to the independent ethics committee who acted as a safety authority. Adherence to the exercise protocol is presented as the percentage of participants with  $\geq 70\%$  attendance at the recommended number of exercise sessions and training at the prescribed exercise intensity prescription during the exercise sessions. Participants were deemed to be training at the prescribed intensity, if for MICT they maintained an average RPE between 11-13 during the session; and for HIIT they maintained an average RPE  $\geq 15$  and/or HR  $\geq 85\% \text{HR}_{\text{peak}}$  during the high intensity intervals.

### Statistical analysis

The sample size calculation conducted for the primary outcome, the comparison of groups for change in  $\text{VO}_2\text{peak}$  over a 4-week supervised program, determined 80 participants (40 per group) would be sufficient to detect a 1 MET (3.5mL/kg/min) difference between groups with a standard deviation of 4.75/mL/kg/min, power of 0.9, and 0.05 significance level<sup>1</sup>. For all outcomes, intention-to-treat analyses using linear mixed modelling were performed to investigate the interaction of time and group effects. Time and group were included as fixed effects and subject was included as the random effect. The interaction effect was investigated for the supervised study period (baseline to 4-weeks) and the entire 12-month period (all time points). Data regarding baseline characteristics and exercise adherence were compared using a student's *t*-test for continuous variables and Fisher's exact test for categorical data. Pre-specified per-protocol analyses were conducted including only participants meeting the criteria for exercise adherence<sup>1</sup>. Sensitivity analyses were conducted to account for the effect of medication changes with: (a) the inclusion of relevant medications as covariates, and b) the exclusion of participants with changes to relevant medications.

## References for eMethods

1. Taylor J, Keating SE, Leveritt MD, Holland DJ, Gomersall SR, Coombes JS. Study protocol for the FITR Heart Study: Feasibility, safety, adherence, and efficacy of high intensity interval training in a hospital-initiated rehabilitation program for coronary heart disease. *Contemp Clin Trials Commun*. 2017;8:181-191.
2. Fletcher GF, Ades PA, Kligfield P, et al. Exercise Standards for Testing and Training: A Scientific Statement From the American Heart Association. *Circulation*. 2013;128(8):873-934.
3. Taylor JL, Holland DJ, Spathis JG, et al. Guidelines for the delivery and monitoring of high intensity interval training in clinical populations. *Prog Cardiovasc Dis*. 2019;62(2):140-146.
4. Borg G. *Borg's perceived exertion and pain scales*. Champaign, IL, US: Human Kinetics; 1998.
5. Forman DE, Myers J, Lavie CJ, Guazzi M, Celli B, Arena R. Cardiopulmonary exercise testing: relevant but underused. *Postgrad Med*. 2010;122(6):68-86.
6. Baba R, Nagashima M, Goto M, et al. Oxygen uptake efficiency slope: A new index of cardiorespiratory functional reserve derived from the relation between oxygen uptake and minute ventilation during incremental exercise. *J Am Coll Cardiol*. 1996;28(6):1567-1572.
7. Laukkanen JA, Araújo CGS, Kurl S, et al. Relative peak exercise oxygen pulse is related to sudden cardiac death, cardiovascular and all-cause mortality in middle-aged men. *Eur J Prev Cardiol*. 2018;25(7):772-782.
8. Kokkinos P, Kaminsky LA, Arena R, Zhang J, Myers J. New Generalized Equation for Predicting Maximal Oxygen Uptake (from the Fitness Registry and the Importance of Exercise National Database). *Am J Cardiol*. 2017;120(4):688-692.
9. van Hees VT, Fang Z, Langford J, et al. Autocalibration of accelerometer data for free-living physical activity assessment using local gravity and temperature: an evaluation on four continents. *J Appl Physiol*. 2014;117(7):738.
10. van Hees VT, Gorzelniak L, Leon ECD, et al. Separating movement and gravity components in an acceleration signal and implications for the assessment of human daily physical activity. *PLoS One*. 2013.
11. Hildebrand M, VANH, Hansen BH, Ekelund U. Age group comparability of raw accelerometer output from wrist- and hip-worn monitors. *Med Sci Sports Exerc*. 2014;46(9):1816-1824.

**eTable 1.** Medication adjustments throughout the study period

| Medication Adjustments                            | 4 weeks        |                | 3 months       |               | 6 months     |                | 12 months      |                | Total          |                |
|---------------------------------------------------|----------------|----------------|----------------|---------------|--------------|----------------|----------------|----------------|----------------|----------------|
| Group (n)                                         | HIIT (43)      | MICT (44)      | HIIT (37)      | MICT (40)     | HIIT (37)    | MICT (39)      | HIIT (34)      | MICT (37)      | HIIT           | MICT           |
| <b>Medication ceased</b>                          |                |                |                |               |              |                |                |                |                |                |
| β -blocker                                        | 3              | 1              | 0              | 0             | 0            | 0              | 2              | 1              | 5              | 2              |
| ACE inhibitor                                     | 0              | 2              | 0              | 0             | 0            | 0              | 0              | 0              | 0              | 2              |
| Diuretic                                          | 2              | 0              | 1              | 0             | 0            | 0              | 0              | 0              | 3              | 0              |
| Statin                                            | 0              | 1              | 1              | 0             | 0            | 0              | 0              | 0              | 0              | 2              |
| Aspirin                                           | 0              | 2              | 0              | 0             | 0            | 2              | 1              | 0              | 1              | 4              |
| Anti-platelet                                     | 0              | 1              | 0              | 0             | 1            | 1              | 9              | 8              | 9              | 9              |
| Anti-arrhythmic                                   | 0              | 1              | 0              | 0             | 0            | 0              | 0              | 1              | 0              | 2              |
| <b>Total ceased</b>                               | <b>5</b>       | <b>8</b>       | <b>2</b>       | <b>0</b>      | <b>1</b>     | <b>3</b>       | <b>12</b>      | <b>10</b>      | <b>20</b>      | <b>21</b>      |
| <b>Medication added</b>                           |                |                |                |               |              |                |                |                |                |                |
| β -blocker                                        | 0              | 0              | 0              | 1             | 0            | 0              | 0              | 0              | 0              | 1              |
| Calcium channel blocker                           | 0              | 0              | 0              | 0             | 0            | 0              | 1              | 0              | 1              | 0              |
| Angiotensin II receptor blocker                   | 0              | 0              | 0              | 0             | 1            | 0              | 0              | 0              | 1              | 0              |
| Diuretic                                          | 0              | 0              | 0              | 0             | 0            | 1              | 0              | 0              | 0              | 1              |
| Anti-platelet                                     | 0              | 0              | 1              | 0             | 0            | 0              | 0              | 0              | 2              | 0              |
| Anti-coagulant                                    | 0              | 1              | 0              | 0             | 0            | 1              | 0              | 0              | 0              | 2              |
| Non-statin cholesterol lowering                   | 2              | 0              | 0              | 1             | 0            | 0              | 1              | 3              | 2              | 4              |
| Oral hypoglycaemic                                | 1              | 0              | 0              | 0             | 0            | 0              | 0              | 0              | 1              | 0              |
| <b>Total added</b>                                | <b>3</b>       | <b>1</b>       | <b>1</b>       | <b>2</b>      | <b>1</b>     | <b>2</b>       | <b>2</b>       | <b>3</b>       | <b>7</b>       | <b>8</b>       |
| <b>Medication decreased</b>                       |                |                |                |               |              |                |                |                |                |                |
| β -blocker                                        | 1              | 2              | 1              | 0             | 0            | 1              | 1              | 0              | 3              | 3              |
| ACE inhibitor                                     | 1              | 0              | 1              | 0             | 0            | 0              | 0              | 0              | 0              | 2              |
| Angiotensin II receptor blocker                   | 0              | 1              | 2              | 0             | 1            | 0              | 1              | 0              | 4              | 1              |
| Diuretic                                          | 0              | 0              | 0              | 1             | 0            | 0              | 0              | 0              | 0              | 1              |
| Statin                                            | 0              | 1              | 0              | 0             | 0            | 1              | 1              | 2              | 1              | 3              |
| Aspirin                                           | 0              | 1              | 0              | 0             | 0            | 0              | 0              | 0              | 0              | 1              |
| <b>Total decreased</b>                            | <b>2</b>       | <b>5</b>       | <b>4</b>       | <b>1</b>      | <b>1</b>     | <b>2</b>       | <b>3</b>       | <b>2</b>       | <b>10</b>      | <b>10</b>      |
| <b>Medication increased</b>                       |                |                |                |               |              |                |                |                |                |                |
| β -blocker                                        | 0              | 3              | 1              | 0             | 0            | 0              | 0              | 1              | 1              | 4              |
| ACE inhibitor                                     | 0              | 1              | 0              | 0             | 0            | 0              | 0              | 0              | 0              | 1              |
| Angiotensin II receptor blocker                   | 1              | 0              | 0              | 0             | 0            | 1              | 2              | 1              | 2              | 2              |
| Statin                                            | 0              | 0              | 1              | 1             | 0            | 1              | 1              | 2              | 0              | 5              |
| Anti-coagulant                                    | 0              | 1              | 0              | 0             | 0            | 0              | 0              | 0              | 0              | 1              |
| <b>Total increased</b>                            | <b>1</b>       | <b>5</b>       | <b>2</b>       | <b>1</b>      | <b>0</b>     | <b>2</b>       | <b>3</b>       | <b>4</b>       | <b>6</b>       | <b>12</b>      |
| <b>Medication type changed</b>                    |                |                |                |               |              |                |                |                |                |                |
| β -blocker                                        | 0              | 0              | 0              | 1             | 0            | 0              | 1              | 1              | 1              | 2              |
| ACE inhibitor                                     | 0              | 0              | 1              | 0             | 0            | 0              | 0              | 0              | 1              | 0              |
| Statin                                            | 0              | 1              | 0              | 1             | 0            | 2              | 0              | 0              | 0              | 4              |
| Anti-platelet                                     | 0              | 0              | 0              | 0             | 0            | 1              | 0              | 0              | 0              | 1              |
| Oral hypoglycaemic                                | 0              | 0              | 0              | 1             | 0            | 0              | 0              | 0              | 0              | 1              |
| <b>Total type changed</b>                         | <b>0</b>       | <b>1</b>       | <b>1</b>       | <b>3</b>      | <b>0</b>     | <b>3</b>       | <b>1</b>       | <b>1</b>       | <b>2</b>       | <b>8</b>       |
| <b>Total medication adjustments, n (%)</b>        | <b>11 (26)</b> | <b>20 (46)</b> | <b>10 (27)</b> | <b>7 (18)</b> | <b>3 (8)</b> | <b>12 (31)</b> | <b>21 (62)</b> | <b>20 (54)</b> | <b>45 (56)</b> | <b>59 (61)</b> |
| <b>Total participants with adjustments, n (%)</b> | <b>8 (19)</b>  | <b>13 (30)</b> | <b>7 (19)</b>  | <b>6 (15)</b> | <b>3 (8)</b> | <b>10 (26)</b> | <b>13 (38)</b> | <b>15 (41)</b> | <b>24 (56)</b> | <b>27 (61)</b> |

Data is presented as number of changes unless otherwise indicated. HIIT – high intensity interval training; MICT – moderate intensity continuous training; ACE – angiotensin-converting enzyme.

**eTable 2.** Serious adverse events

| Event #                      | Group | Type                                       | Severity          | Related to Exercise | Remained in the study | Omitted from testing  | Reason for the event                      |
|------------------------------|-------|--------------------------------------------|-------------------|---------------------|-----------------------|-----------------------|-------------------------------------------|
| <b>Stage 1 (Weeks 1-4)</b>   |       |                                            |                   |                     |                       |                       |                                           |
| #1                           | MICT  | Stroke                                     | Hospitalisation   | No                  | Yes                   | Week 4                | Post-operative complication               |
| #2                           | HIIT  | Post-exercise hypotension                  | Medical emergency | Yes                 | Yes                   | No                    | Addition of diuretic medication           |
| #3                           | HIIT  | Pericarditis                               | Hospitalisation   | No                  | No                    | All follow-up testing | Post-operative complication               |
| #4                           | MICT  | Atrial fibrillation                        | Hospitalisation   | No                  | Yes                   | No                    | History of paroxysmal atrial fibrillation |
| <b>Stage 2 (Weeks 5-12)</b>  |       |                                            |                   |                     |                       |                       |                                           |
| #5                           | HIIT  | Pericarditis                               | Hospitalisation   | No                  | Yes                   | 3 month               | Post-operative complication               |
| <b>Stage 3 (Weeks 13-52)</b> |       |                                            |                   |                     |                       |                       |                                           |
| #6                           | HIIT  | Third degree AV block, pacemaker insertion | Hospitalisation   | No                  | No                    | 6 month and 12 month  | History of first degree AV block          |
| #7                           | HIIT  | Unstable angina, coronary stent            | Hospitalisation   | No                  | Yes                   | No                    | In-stent restenosis                       |
| #8                           | MICT  | Unstable angina coronary stent             | Hospitalisation   | No                  | No                    | 12 month              | Residual CAD                              |
| #9                           | HIIT  | NSTEMI, coronary stent                     | Hospitalisation   | No                  | No                    | 12 month              | Residual CAD                              |

SAEs are described as individual episodes.

HIIT – High intensity interval training; MICT – Moderate intensity continuous training; CAD – Coronary artery disease, AV – Atrioventricular, NSTEMI – Non-ST-elevation myocardial infarction.

**eTable 3.** Exercise intensity during stages 1 and 2

| Measure of exercise intensity                                 | Supervised training |             |         | Home-based training  |             |         |
|---------------------------------------------------------------|---------------------|-------------|---------|----------------------|-------------|---------|
|                                                               | Stage 1 (weeks 1-4) |             |         | Stage 2 (weeks 5-12) |             |         |
|                                                               | HIIT (n=43)         | MICT (n=43) | p value | HIIT (n=37)          | MICT (n=40) | p value |
| Average training RPE                                          | 16.0 ± 1.1          | 12.4 ± 0.6  | <0.001* | 16.5 ± 1.2           | 12.4 ± 0.5  | <0.001* |
| Peak training RPE                                             | 16.5 ± 1.1          | 12.7 ± 0.6  | <0.001* | 16.9 ± 1.2           | 12.5 ± 0.5  | <0.001* |
| Average training %HR <sub>peak</sub> (based on highest CPET)  | 87 ± 6              | 70 ± 8      | <0.001* | 88 ± 7               | NR          | ---     |
| Peak training %HR <sub>peak</sub> (based on highest CPET)     | 90 ± 6              | 72 ± 8      | <0.001* | 89 ± 7               | NR          | ---     |
| Average training %HR <sub>peak</sub> (based on baseline CPET) | 91 ± 5              | 75 ± 9      | <0.001* | 93 ± 6               | NR          | ---     |
| Peak training %HR <sub>peak</sub> (based on baseline CPET)    | 94 ± 5              | 76 ± 9      | <0.001* | 95 ± 9               | NR          | ---     |

Values are presented as mean ± standard deviation unless otherwise stated. Symbol \* denotes significant difference between groups.

HIIT – high intensity interval training; MICT – moderate intensity continuous training; RPE – rating of perceived exertion; n – number of participants; %HR<sub>peak</sub> – percentage of peak heart rate; CPET – cardiopulmonary exercise test; NR – not recorded at this timepoint. %HR<sub>peak</sub> was calculated from the CPET with highest HR<sub>peak</sub> attained over the 12 months, unless the change in HR<sub>peak</sub> was associated with adjustments to β-blockade.

**eTable 4.** Adherence to exercise training protocols

| Outcome measure                                                                          | Supervised training                                                                                                                                                                                                                                                                                                                                                                                                                                                                                                            |                |               | Home-based training |                |         |                                                                                                                                                                                                                                                                                                                                                                                                                                        |                |         |                |                |         |
|------------------------------------------------------------------------------------------|--------------------------------------------------------------------------------------------------------------------------------------------------------------------------------------------------------------------------------------------------------------------------------------------------------------------------------------------------------------------------------------------------------------------------------------------------------------------------------------------------------------------------------|----------------|---------------|---------------------|----------------|---------|----------------------------------------------------------------------------------------------------------------------------------------------------------------------------------------------------------------------------------------------------------------------------------------------------------------------------------------------------------------------------------------------------------------------------------------|----------------|---------|----------------|----------------|---------|
|                                                                                          | 4 weeks                                                                                                                                                                                                                                                                                                                                                                                                                                                                                                                        |                |               | 3 months            |                |         | 6 months                                                                                                                                                                                                                                                                                                                                                                                                                               |                |         | 12 months      |                |         |
|                                                                                          | HIIT<br>(n=44)                                                                                                                                                                                                                                                                                                                                                                                                                                                                                                                 | MICT<br>(n=43) | p value       | HIIT<br>(n=37)      | MICT<br>(n=41) | p value | HIIT<br>(n=37)                                                                                                                                                                                                                                                                                                                                                                                                                         | MICT<br>(n=39) | p value | HIIT<br>(n=34) | MICT<br>(n=37) | p value |
| Adherence to exercise training protocols, n (%)                                          | 39 (91)                                                                                                                                                                                                                                                                                                                                                                                                                                                                                                                        | 39 (91)        | 1.000         | 25 (68)             | 30 (75)        | 0.614   | 21 (57)                                                                                                                                                                                                                                                                                                                                                                                                                                | 15 (38)        | 0.107   | 18 (53)        | 15 (41)        | 0.346   |
| • Adherence to attendance at exercise sessions, n (%)                                    | 43(100)                                                                                                                                                                                                                                                                                                                                                                                                                                                                                                                        | 39 (91)        | 0.116         | 25 (68)             | 31 (78)        | 0.443   | 24 (65)                                                                                                                                                                                                                                                                                                                                                                                                                                | 26 (67)        | 1.000   | 19 (56)        | 26 (70)        | 0.229   |
| • Adherence to prescribed exercise intensity, n (%)                                      | 39 (91)                                                                                                                                                                                                                                                                                                                                                                                                                                                                                                                        | 42 (98)        | 0.360         | 31 (84)             | 35 (88)        | 0.750   | 26 (70)                                                                                                                                                                                                                                                                                                                                                                                                                                | 21 (54)        | 0.241   | 23 (68)        | 18 (49)        | 0.149   |
| Total exercise sessions per week                                                         | 3.3<br>±1.0                                                                                                                                                                                                                                                                                                                                                                                                                                                                                                                    | 4.1<br>±1.6    | <b>0.014*</b> | 2.8<br>± 1.7        | 3.3<br>± 1.8   | 0.255   | 3.5<br>± 1.5                                                                                                                                                                                                                                                                                                                                                                                                                           | 3.7<br>± 1.6   | 0.643   | 3.1<br>± 1.8   | 3.5<br>± 2.1   | 0.495   |
| Total exercise minutes per week                                                          | 125<br>± 59                                                                                                                                                                                                                                                                                                                                                                                                                                                                                                                    | 200<br>± 123   | <b>0.001*</b> | 142<br>± 114        | 193<br>± 135   | 0.083   | 145<br>± 89                                                                                                                                                                                                                                                                                                                                                                                                                            | 174<br>± 92    | 0.228   | 138<br>± 112   | 173<br>± 134   | 0.243   |
| <b>Classification of participants not training at the recommended exercise intensity</b> |                                                                                                                                                                                                                                                                                                                                                                                                                                                                                                                                |                |               |                     |                |         |                                                                                                                                                                                                                                                                                                                                                                                                                                        |                |         |                |                |         |
| Group                                                                                    | 6 months                                                                                                                                                                                                                                                                                                                                                                                                                                                                                                                       |                |               |                     |                |         | 12 months                                                                                                                                                                                                                                                                                                                                                                                                                              |                |         |                |                |         |
| HIIT                                                                                     | Not training at recommended exercise intensity = 30% of participants<br><ul style="list-style-type: none"> <li>• 8% performing interval training at a lower intensity (&lt;RPE 15)</li> <li>• 8% performing a form of MICT instead of HIIT</li> <li>• 8% performing a form of MICT in combination with HIIT</li> <li>• 5% not performing any exercise</li> </ul>                                                                                                                                                               |                |               |                     |                |         | Not training at recommended exercise intensity = 32% of participants<br><ul style="list-style-type: none"> <li>• 9% performing interval training at a lower intensity (&lt;RPE 15)</li> <li>• 8% performing a form of MICT instead of HIIT</li> <li>• 3% performing a form of MICT in combination with HIIT</li> <li>• 12% not performing any exercise</li> </ul>                                                                      |                |         |                |                |         |
| MICT                                                                                     | Not training at recommended exercise intensity = 46% of participants<br><ul style="list-style-type: none"> <li>• 28% performing continuous training at a higher intensity (≥RPE 15)</li> <li>• 5% performing a form of HIIT instead of MICT</li> <li>• 5% performing a form of HIIT in combination with MICT</li> <li>• 3% performing continuous training at a lower intensity (RPE&lt;11)</li> <li>• 3% performing interval training at a moderate intensity (RPE 11-13)</li> <li>• 3% not performing any exercise</li> </ul> |                |               |                     |                |         | Not training at recommended exercise intensity = 51% of participants<br><ul style="list-style-type: none"> <li>• 14% performing continuous training at a high intensity (≥RPE 15)</li> <li>• 3% performing a form of HIIT instead of MICT</li> <li>• 16% performing HIIT in combination with MICT</li> <li>• 5% performing continuous training at a lower intensity (&lt;RPE 11)</li> <li>• 14% not performing any exercise</li> </ul> |                |         |                |                |         |

Values are presented as mean ± standard deviation unless otherwise stated. Symbol \* denotes significant difference between groups.

HIIT – high intensity interval training; MICT – moderate intensity continuous training. Adherence to the exercise training protocol involves: ≥ 70% attendance at the recommended number of exercise sessions and whether the participant trained at the recommended exercise intensity prescription during the exercise sessions.



**eTable 5.** Per-protocol analyses

| Outcome measure                                             | n  | Supervised training (Stage 1) |                |                         |                         | Group<br>*Time<br>Effect | n  | Home-based training (Stage 3) |                |                          |                          | Effect |                |
|-------------------------------------------------------------|----|-------------------------------|----------------|-------------------------|-------------------------|--------------------------|----|-------------------------------|----------------|--------------------------|--------------------------|--------|----------------|
|                                                             |    | Baseline                      |                | Change in 4 weeks       |                         |                          |    | Baseline                      |                | Change in 12 months      |                          | Time   | Group<br>*Time |
|                                                             |    | HIIT                          | MICT           | HIIT                    | MICT                    |                          |    | HIIT                          | MICT           | HIIT                     | MICT                     |        |                |
| <b>CARDIORESPIRATORY FITNESS AND VENTILATORY EFFICIENCY</b> |    |                               |                |                         |                         |                          |    |                               |                |                          |                          |        |                |
| Peak oxygen uptake (ml/kg/min)                              | 78 | 28.4<br>±6.2                  | 27.9<br>7.3    | 3.2*<br>(2.1, 4.3)      | 1.1*<br>(0.1, 2.2)      | 0.010                    | 33 | 29.3<br>±6.6                  | 26.0<br>±8.5   | 5.2*<br>(3.3, 7.2)       | 2.2*<br>(0.0, 4.3)       | <0.001 | 0.039          |
| Peak Oxygen uptake (mL/kgLBM/min)                           | 78 | 41.9<br>±7.5                  | 42.1<br>9.3    | 4.5*<br>(2.9, 6.1)      | 1.0<br>(-0.6, 2.5)      | 0.002                    | 33 | 42.1<br>±8.6                  | 38.5<br>10.2   | 7.1*<br>(4.3, 10.0)      | 2.0<br>(-1.2, 5.1)       | <0.001 | 0.019          |
| Peak oxygen uptake (L/min)                                  | 78 | 2.41<br>± 0.62                | 2.40<br>± 0.66 | 0.25*<br>(0.16, 0.35)   | 0.09<br>(0.0, 0.18)     | 0.017                    | 33 | 2.40<br>± 0.67                | 2.01<br>±0.65  | 0.36*<br>(0.22, 0.51)    | 0.09<br>(-0.07, 0.25)    | <0.001 | 0.015          |
| Peak respiratory exchange ratio                             | 78 | 1.14<br>± 0.09                | 1.14<br>± 0.09 | -0.02<br>(-0.05, 0.02)  | -0.01<br>(-0.04, 0.02)  | 0.782                    | 33 | 1.17<br>±0.1                  | 1.13<br>±0.1   | -0.04<br>(-0.08, 0.01)   | 0.00<br>(-0.05, 0.05)    | 0.232  | 0.264          |
| Peak heart rate (beats/min)                                 | 78 | 153<br>± 17                   | 147<br>± 20    | 0<br>(-4, 4)            | -2<br>(-5, 2)           | 0.556                    | 33 | 155<br>± 17                   | 142<br>± 18    | 3<br>(-5, 10)            | 11*<br>(3, 19)           | 0.017  | 0.152          |
| Peak oxygen pulse (mL/beat)                                 | 78 | 15.8<br>±3.9                  | 16.2<br>±3.6   | 1.8*<br>(1.1, 2.5)      | 0.8*<br>(0.1, 1.5)      | 0.047                    | 33 | 15.5<br>±3.7                  | 14.1<br>±3.8   | 2.1*<br>(1.1, 3.1)       | -0.5<br>(-1.6, 0.6)      | 0.029  | 0.001          |
| Maximal OUES                                                | 78 | 2.5<br>± 0.8                  | 2.4<br>± 0.6   | 0.3*<br>(0.1, 0.4)      | 0.2*<br>(0.0, 0.4)      | 0.584                    | 33 | 2.6<br>± 0.8                  | 2.1<br>± 0.6   | 0.3*<br>(0.1, 0.5)       | 0.1<br>(-0.2, 0.3)       | 0.032  | 0.111          |
| <b>CARDIOVASCULAR RISK FACTORS</b>                          |    |                               |                |                         |                         |                          |    |                               |                |                          |                          |        |                |
| Body mass (kg)                                              | 78 | 84<br>± 14                    | 86<br>± 15     | -1*<br>(-1, 0)          | -1*<br>(-1, 0)          | 0.730                    | 33 | 81<br>± 13                    | 77<br>± 12     | -1.8*<br>(-3.2, -0.4)    | -2.5*<br>(-4.0, -0.9)    | <0.001 | 0.524          |
| Body mass index (kg/m)                                      | 78 | 27.8<br>±4.1                  | 28.1<br>±3.9   | -0.1<br>(-0.4, 0.2)     | -0.3*<br>(-0.6, 0.0)    | 0.304                    | 33 | 27.1<br>±3.0                  | 26.1<br>±3.2   | -0.6*<br>(-1.2, -0.1)    | -1.2*<br>(-1.8, -0.6)    | <0.001 | 0.193          |
| Waist circumference (cm)                                    | 78 | 99.6<br>± 12.5                | 98.5<br>± 11.1 | -2.0*<br>(-3.1, -1.0)   | -1.6*<br>(-2.6, -0.5)   | 0.529                    | 33 | 96.4<br>± 12.3                | 92.9<br>± 11.4 | -3.7*<br>(-5.9, 1.5)     | -4.8*<br>(-7.3, 2.3)     | <0.001 | 0.512          |
| Waist to Hip Ratio                                          | 78 | 0.96<br>± 0.08                | 0.94<br>± 0.07 | -0.01*<br>(-0.02, 0.00) | -0.01*<br>(-0.03, 0.00) | 0.930                    | 33 | 0.93<br>± 0.10                | 0.92<br>± 0.07 | -0.02*<br>(-0.04, -0.01) | -0.03*<br>(-0.05, -0.02) | <0.001 | 0.401          |
| Waist to Height Ratio                                       | 78 | 0.57<br>± 0.07                | 0.56<br>± 0.06 | -0.01*<br>(-0.02, 0.01) | -0.01*<br>(-0.03, 0.00) | 0.670                    | 33 | 0.56<br>± 0.06                | 0.54<br>± 0.06 | -0.02*<br>(-0.03, -0.01) | -0.03*<br>(-0.04, -0.01) | <0.001 | 0.534          |
| Lean body mass (kg)                                         | 78 | 57.0<br>±8.9                  | 56.8<br>±9.6   | 0.1<br>(-0.3, 0.6)      | 0.5*<br>(0.1, 1.0)      | 0.176                    | 33 | 56.7<br>±9.7                  | 52.1<br>±9.3   | -0.5<br>(-1.3, 0.3)      | -0.6<br>(-1.5, 0.3)      | 0.067  | 0.880          |
| Visceral adipose tissue DEXA (cm <sup>2</sup> )             | 78 | 193<br>± 78                   | 193<br>± 73    | -10*<br>(-15, -5)       | -10*<br>(-15, -5)       | 0.819                    | 33 | 166<br>± 75                   | 160<br>± 64    | -14*<br>(-28, -1)        | -18*<br>(-33, -4)        | 0.002  | 0.697          |

|                                               |    |              |              |                     |                     |              |    |              |              |                     |                    |                  |              |
|-----------------------------------------------|----|--------------|--------------|---------------------|---------------------|--------------|----|--------------|--------------|---------------------|--------------------|------------------|--------------|
| Total cholesterol (mg/dL)                     | 78 | 143<br>± 27  | 139<br>± 31  | -4<br>(-12, 4)      | 4<br>(-4, 8)        | 0.140        | 33 | 147<br>± 35  | 143<br>± 31  | 4<br>(-12, 15)      | 4<br>(-8, 19)      | 0.390            | 0.697        |
| LDL cholesterol (mg/dL)                       | 78 | 73<br>± 23   | 73<br>± 23   | -4<br>(-12, 4)      | -4<br>(-4, 8)       | 0.154        | 33 | 73<br>± 31   | 69<br>± 23   | -4<br>(-15, 4)      | 0.0<br>(-12, 12)   | 0.630            | 0.385        |
| HDL cholesterol (mg/dL)                       | 78 | 50<br>± 12   | 50<br>± 15   | 0<br>(0, 4)         | 0<br>(0, 4)         | 0.807        | 33 | 50<br>± 12   | 54<br>± 19   | 4*<br>(0, 8)        | 4*<br>(0, 8)       | <b>0.002</b>     | 0.946        |
| Triglycerides (mmol/L)                        | 78 | 115<br>± 142 | 97<br>± 35   | -18<br>(-35, 9)     | 0<br>(-27, 18)      | 0.500        | 33 | 97<br>± 27   | 97<br>± 44   | 0<br>(-27, 18)      | 0<br>(-27, 27)     | 0.986            | 0.844        |
| Fasting glucose (mg/dL)                       | 78 | 106<br>± 32  | 108<br>± 22  | -4<br>(-13, 4)      | -2<br>(-7, 9)       | 0.366        | 33 | 103<br>± 9   | 110<br>± 25  | -2<br>(-7, 2)       | 2<br>(-4, 7)       | 0.850            | 0.273        |
| Insulin Resistance (HOMA-IR)                  | 78 | 2.8<br>± 2.2 | 2.4<br>± 1.9 | -0.2<br>(-0.8, 0.3) | -0.1<br>(-0.7, 0.4) | 0.795        | 33 | 2.3<br>± 1.7 | 2.4<br>± 2.2 | -0.5<br>(-1.2, 0.2) | 0.0<br>(-0.7, 0.8) | 0.339            | 0.279        |
| Resting heart rate (beats/min)                | 78 | 55<br>± 9    | 55<br>± 8    | -2*<br>(-4, 0)      | -1<br>(-3, 1)       | 0.203        | 33 | 55<br>± 9    | 52<br>± 6    | -3<br>(-5, 0)       | 2<br>(-1, 5)       | 0.630            | <b>0.035</b> |
| Peripheral, systolic blood pressure (mmHg)    | 78 | 127<br>± 16  | 129<br>± 14  | 3<br>(-1, 6)        | -4*<br>(-8, -1)     | <b>0.011</b> | 33 | 131<br>± 19  | 129<br>± 16  | 2<br>(-6, 10)       | -3<br>(-12, 5)     | 0.783            | 0.353        |
| Peripheral, diastolic blood pressure (mmHg)   | 78 | 74<br>± 10   | 74<br>± 9    | 2<br>(0, 4)         | -2<br>(-4, 0)       | <b>0.012</b> | 33 | 76<br>± 11   | 70<br>± 6    | 0<br>(-4, 4)        | 0<br>(-4, 4)       | 0.945            | 0.977        |
| <b>QUALITY OF LIFE AND EXERCISE ENJOYMENT</b> |    |              |              |                     |                     |              |    |              |              |                     |                    |                  |              |
| McNew – Global                                | 78 | 5.9<br>± 0.8 | 6.0<br>± 0.6 | 0.5*<br>(0.4, 0.7)  | 0.4*<br>(0.2, 0.5)  | 0.164        | 33 | 6.0<br>± 0.7 | 6.0<br>± 0.6 | 0.5*<br>(0.2, 0.8)  | 0.4*<br>(0.1, 0.7) | <b>&lt;0.001</b> | 0.615        |
| Exercise enjoyment (%)                        | 77 | 74<br>± 18   | 80<br>± 14   | 2<br>(-3, 8)        | 1<br>(-4, 7)        | 0.811        | 33 | 77<br>± 14   | 83<br>± 10   | 1<br>(-8, 9)        | -8<br>(-17, 1)     | 0.229            | 0.167        |

Per-protocol analysis includes only participants meeting the criteria for adherence to the exercise protocol. The adherence criteria involves ≥ 70% attendance at the recommended number of exercise sessions and training at the prescribed exercise intensity prescription during the exercise sessions. Baseline data results presented as mean ± standard deviation. Follow-up data results presented as mean change (95% confidence interval). P values are provided for group and time interaction effects after 4 weeks and 12 months and for time effects after 12 months. The symbol\* denotes significant difference from baseline. HIIT - high intensity interval training; MICT – moderate intensity continuous training; ml.kgLBM.min-1 – normalised for lean body mass; OUES – oxygen uptake efficiency slope; DEXA – dual-energy x-ray absorptiometry; LDL – low-density lipoprotein; HDL – high-density lipoprotein; HOMA-IR – homeostatic model assessment of insulin resistance; MVPA – moderate to vigorous physical activity. SI conversion factors: To convert total cholesterol to millimoles per liter, multiply by 0.0259; LDL cholesterol to millimoles per liter, multiply by 0.0259; HDL cholesterol to millimoles per liter, multiply by 0.0259; triglycerides to millimoles per liter, multiply by 0.0113; fasting glucose to millimoles per liter, multiply by 0.0555.

**eTable 6.** Participant feasibility

|                                                                                        | 4 weeks           |                   |              | 3 months          |                   |              | 6 months          |                   |         | 12 months         |                   |         |
|----------------------------------------------------------------------------------------|-------------------|-------------------|--------------|-------------------|-------------------|--------------|-------------------|-------------------|---------|-------------------|-------------------|---------|
| Feasibility question                                                                   | HIIT<br>(n=43)    | MICT<br>(n=43)    | p value      | HIIT<br>(n=37)    | MICT<br>(n=40)    | p value      | HIIT<br>(n=37)    | MICT<br>(n=39)    | p value | HIIT<br>(n=34)    | MICT<br>(n=37)    | p value |
| <b>Intention to continue with exercise protocol</b>                                    |                   |                   |              |                   |                   |              |                   |                   |         |                   |                   |         |
| Yes – willing to continue this exercise protocol, n (%)                                | 42<br>(98)        | 42<br>(98)        | 1.000        | 37 (100)          | 40 (100)          | 1.000        | 37 (100)          | 39 (100)          | 1.000   | 31 (91)           | 34 (92)           | 1.000   |
| No – not willing to continue this exercise protocol, n (%)                             | 1 (2)             | 1 (2)             | 1.000        | 0 (0)             | 0 (0)             | 1.000        | 0 (0)             | 0 (0)             | 1.000   | 3 (9)             | 3 (8)             | 1.000   |
| <b>Performing exercise protocol (based on 7-point likert scale)</b>                    |                   |                   |              |                   |                   |              |                   |                   |         |                   |                   |         |
| Confidence in performing exercise protocol                                             | 6.6<br>(6.4, 6.8) | 6.4<br>(6.1, 6.7) | 0.501        | 6.6<br>(6.4, 6.8) | 6.4<br>(6.1, 6.7) | 0.312        | 6.1<br>(5.7, 6.5) | 6.3<br>(5.9, 6.6) | 0.363   | 6.2<br>(5.7, 6.6) | 6.0<br>(5.4, 6.6) | 0.934   |
| Ability to independently manage exercise intensity                                     | 6.5<br>(6.3, 6.7) | 6.1<br>(5.8, 6.4) | <b>0.040</b> | 6.6<br>(6.4, 6.8) | 6.2<br>(5.9, 6.5) | 0.177        | 6.2<br>(6.0, 6.5) | 6.1<br>(5.7, 6.5) | 0.955   | 6.2<br>(5.8, 6.7) | 5.8<br>(5.3, 6.3) | 0.132   |
| Enjoyment of exercise protocol                                                         | 5.5<br>(5.0, 5.9) | 5.4<br>(5.0, 5.9) | 0.914        | 5.6<br>(5.2, 6.1) | 5.5<br>(5.0, 6.0) | 0.882        | 5.2<br>(4.8, 5.7) | 5.3<br>(4.8, 5.7) | 0.957   | 5.4<br>(4.9, 6.0) | 5.5<br>(4.9, 6.0) | 0.744   |
| Ease of understanding instructions for exercise protocol                               | 6.6<br>(6.4, 6.8) | 6.3<br>(6.0, 6.6) | 0.286        | 6.9<br>(6.8, 7.0) | 6.6<br>(6.3, 6.8) | <b>0.010</b> | NR                | NR                | NR      | NR                | NR                | NR      |
| <b>Completion of exercise protocol</b>                                                 |                   |                   |              |                   |                   |              |                   |                   |         |                   |                   |         |
| <b>How often was the participant unable to complete their exercise protocol, n (%)</b> |                   |                   |              |                   |                   |              |                   |                   |         |                   |                   |         |
| Never                                                                                  | 24<br>(56)        | 18<br>(42)        | 0.281        | 14<br>(39)        | 14<br>(35)        | 0.817        | 13<br>(35)        | 15<br>(39)        | 0.815   | 9<br>(27)         | 9<br>(24)         | 1.000   |
| Occasionally                                                                           | 18<br>(40)        | 22<br>(51)        | 0.386        | 20<br>(54)        | 18<br>(45)        | 0.497        | 20<br>(54)        | 22<br>(56)        | 1.000   | 20<br>(59)        | 23<br>(62)        | 0.812   |
| Frequently                                                                             | 2<br>(5)          | 3<br>(7)          | 1.000        | 3<br>(8)          | 8<br>(20)         | 0.196        | 4<br>(11)         | 2<br>(5)          | 0.425   | 5<br>(15)         | 5<br>(14)         | 1.000   |
| <b>Reasons for being unable to complete their protocol, n</b>                          |                   |                   |              |                   |                   |              |                   |                   |         |                   |                   |         |
| Fatigue                                                                                | 1                 | 2                 |              | 2                 | 2                 |              | 2                 | 3                 |         | 4                 | 3                 |         |
| Unwell/illness                                                                         | 6                 | 8                 |              | 3                 | 6                 |              | 5                 | 4                 |         | 6                 | 7                 |         |
| Injury                                                                                 | 3                 | 5                 |              | 8                 | 8                 |              | 5                 | 4                 |         | 7                 | 6                 |         |
| Low motivation                                                                         | 1                 | 2                 |              | 3                 | 6                 |              | 1                 | 4                 |         | 4                 | 5                 |         |
| Work/other commitments                                                                 | 4                 | 8                 |              | 5                 | 7                 |              | 8                 | 4                 |         | 5                 | 6                 |         |
| Travel                                                                                 | 1                 | 0                 |              | 1                 | 4                 |              | 1                 | 5                 |         | 2                 | 3                 |         |
| Weather                                                                                | 0                 | 0                 |              | 3                 | 1                 |              | 3                 | 2                 |         | 1                 | 1                 |         |

| Feasibility question                                                                                               | 4 weeks        |                |            | 3 months       |                |            | 6 months       |                |            | 12 months      |                |            |
|--------------------------------------------------------------------------------------------------------------------|----------------|----------------|------------|----------------|----------------|------------|----------------|----------------|------------|----------------|----------------|------------|
|                                                                                                                    | HIIT<br>(n=43) | MICT<br>(n=43) | p<br>value | HIIT<br>(n=37) | MICT<br>(n=40) | p<br>value | HIIT<br>(n=37) | MICT<br>(n=39) | p<br>value | HIIT<br>(n=34) | MICT<br>(n=37) | p<br>value |
| <b>Unpleasant effects or symptoms from exercise</b>                                                                |                |                |            |                |                |            |                |                |            |                |                |            |
| <b>How often did the participant experience unpleasant effects or symptoms from their exercise protocol, n (%)</b> |                |                |            |                |                |            |                |                |            |                |                |            |
| Never                                                                                                              | 30 (71)        | 34 (79)        | 0.459      | 27 (73)        | 27 (68)        | 0.628      | 30 (81)        | 27 (71)        | 0.419      | 21 (62)        | 28 (76)        | 0.304      |
| Occasionally                                                                                                       | 11 (26)        | 9 (21)         | 0.616      | 10 (27)        | 13 (33)        | 0.628      | 6 (16)         | 9 (24)         | 0.565      | 12 (35)        | 8 (22)         | 0.291      |
| Frequently                                                                                                         | 1 (2)          | 0 (0)          | 0.494      | 0 (0)          | 0 (0)          | 1.000      | 1 (3)          | 2 (5)          | 1.000      | 1 (3)          | 1 (3)          | 1.000      |
| <b>Unpleasant effects or symptoms reported, n</b>                                                                  |                |                |            |                |                |            |                |                |            |                |                |            |
| Chest pain/angina                                                                                                  | 1              | 2              |            | 2              | 2              |            | 2              | 1              |            | 1              | 3              |            |
| Light-headedness                                                                                                   | 3              | 2              |            | 1              | 1              |            | 0              | 2              |            | 0              | 0              |            |
| Palpitations / suspected arrhythmia                                                                                | 1              | 0              |            | 1              | 1              |            | 0              | 0              |            | 2              | 0              |            |
| Shortness of breath                                                                                                | 2              | 1              |            | 1              | 1              |            | 0              | 0              |            | 1              | 0              |            |
| Fatigue                                                                                                            | 1              | 1              |            | 2              | 0              |            | 1              | 2              |            | 1              | 1              |            |
| Joint pain / fatigue                                                                                               | 3              | 1              |            | 1              | 3              |            | 1              | 3              |            | 3              | 0              |            |
| Muscle pain / fatigue                                                                                              | 1              | 4              |            | 1              | 2              |            | 1              | 1              |            | 1              | 1              |            |
| Other (e.g. foot pain, dehydration)                                                                                | 2              | 0              |            | 0              | 1              |            | 0              | 1              |            | 0              | 1              |            |

Values are presented as mean (95% confidence interval) unless otherwise stated. Significance is  $\leq 0.05$ .

HIIT – high intensity interval training; MICT – moderate intensity continuous training; n – number of participants; NR – not recorded at this time-point.

**eTable 7.** Sensitivity analyses

| Outcome measure                                                                        | n          | Supervised training (Stage 1) |               |                    |                    | Group<br>*Time<br>Effect | Home-based training (Stages 2 and 3) |                    |                    |                    |                     |                    | Effect           |                |
|----------------------------------------------------------------------------------------|------------|-------------------------------|---------------|--------------------|--------------------|--------------------------|--------------------------------------|--------------------|--------------------|--------------------|---------------------|--------------------|------------------|----------------|
|                                                                                        |            | Baseline                      |               | Change in 4 weeks  |                    |                          | Change in 3 months                   |                    | Change in 6 months |                    | Change in 12 months |                    | Time             | Group<br>*Time |
|                                                                                        |            | HIIT                          | MICT          | HIIT               | MICT               |                          | HIIT                                 | MICT               | HIIT               | MICT               | HIIT                | MICT               |                  |                |
| <b>CARDIORESPIRATORY FITNESS AND EFFICIENCY – medications included as covariates †</b> |            |                               |               |                    |                    |                          |                                      |                    |                    |                    |                     |                    |                  |                |
| Peak heart rate (beats/min)                                                            | 93         | 151<br>± 17                   | 150<br>± 20   | 1<br>(-2, 4)       | -2<br>(-6, 1)      | 0.251                    | 3<br>(-3, 9)                         | 2<br>(-3, 8)       | 2<br>(-4, 8)       | 2<br>(-4, 8)       | 2<br>(-4, 8)        | 6*<br>(0, 12)      | <b>0.003</b>     | 0.174          |
| Peak oxygen pulse (mL/beat)                                                            | 93         | 15.5<br>± 3.8                 | 15.9<br>± 4.0 | 1.6*<br>(0.9, 2.2) | 0.9*<br>(0.2, 1.6) | 0.141                    | 0.8<br>(-0.3, 1.9)                   | 0.7<br>(-0.3, 1.8) | 1.1<br>(0.0, 2.2)  | 0.2<br>(-0.8, 1.3) | 1.1<br>(-0.1, 2.2)  | 0.1<br>(-1.0, 1.2) | <b>&lt;0.001</b> | 0.282          |
| <b>CARDIORESPIRATORY FITNESS AND EFFICIENCY - excluding medication adjustments #</b>   |            |                               |               |                    |                    |                          |                                      |                    |                    |                    |                     |                    |                  |                |
| Peak heart rate (beats/min)                                                            | 83<br>/ 78 | 151<br>± 17                   | 151<br>± 20   | 1<br>(-3, 4)       | -1<br>(-5, 3)      | 0.491                    | 1<br>(-5, 7)                         | 3<br>(-3, 9)       | 1<br>(-5, 7)       | 1<br>(-5, 7)       | 1<br>(-5, 7)        | 5<br>(-1, 11)      | 0.114            | 0.281          |
| Peak oxygen pulse (mL/beat)                                                            | 83<br>/ 78 | 15.6<br>± 3.8                 | 15.9<br>± 4.1 | 1.6*<br>(0.8, 2.3) | 0.9*<br>(0.1, 1.6) | 0.181                    | 0.9<br>(-0.3, 2.2)                   | 1.0<br>(-0.2, 2.2) | 1.0<br>(-0.2, 2.2) | 0.6<br>(-0.6, 1.8) | 0.8<br>(-0.5, 2.1)  | 0.3<br>(-0.9, 1.5) | <b>&lt;0.001</b> | 0.594          |
| <b>CARDIOVASCULAR RISK FACTORS – medications included as covariates †</b>              |            |                               |               |                    |                    |                          |                                      |                    |                    |                    |                     |                    |                  |                |
| Total cholesterol (mg/dL)                                                              | 93         | 147<br>± 31                   | 147<br>± 31   | -4<br>(-12, 0)     | -4<br>(-8, 4)      | 0.627                    | -4<br>(-12, 8)                       | 0<br>(-8, 8)       | -4<br>(-12, 4)     | 0<br>(-8, 12)      | 0<br>(-8, 12)       | 12*<br>(4, 23)     | <b>0.002</b>     | 0.141          |
| LDL cholesterol (mg/dL)                                                                | 93         | 77<br>± 27                    | 73<br>± 23    | -4<br>(-12, 0)     | 0<br>(-8, 4)       | 0.474                    | -4<br>(-12, 8)                       | 0<br>(-8, 8)       | -4<br>(-12, 4)     | 0<br>(-8, 8)       | -4<br>(-12, 4)      | 8<br>(-4, 15)      | 0.170            | 0.170          |
| HDL cholesterol (mg/dL)                                                                | 93         | 50<br>± 12                    | 50<br>± 15    | 0<br>(0, 4)        | 0<br>(0, 4)        | 0.808                    | 4*<br>(0, 8)                         | 0<br>(0, 4)        | 4<br>(0, 4)        | 4<br>(0, 4)        | 4*<br>(0, 8)        | 4*<br>(4, 8)       | <b>&lt;0.001</b> | 0.423          |
| Triglycerides (mg/dL)                                                                  | 93         | 124<br>± 133                  | 106<br>± 53   | -18<br>(-35, 9)    | -9<br>(-27, 9)     | 0.575                    | -18<br>(-35, 9)                      | -9<br>(-29, 9)     | -9<br>(-35, 9)     | 0<br>(-18, 18)     | -9<br>(-35, 18)     | 9<br>(-9, 35)      | 0.078            | 0.592          |
| Resting heart rate (beats/min)                                                         | 93         | 57<br>± 10                    | 57<br>± 8     | -3*<br>(-5, -1)    | -1<br>(-3, 0)      | 0.192                    | -3*<br>(-6, 0)                       | -2<br>(-5, 1)      | -4*<br>(-7, -2)    | -1<br>(-4, 2)      | -4*<br>(-7, -1)     | -3<br>(-5, 0)      | <b>&lt;0.001</b> | 0.205          |
| Peripheral, systolic blood pressure (mmHg)                                             | 93         | 128<br>± 15                   | 130<br>± 14   | 2<br>(-1, 5)       | -4*<br>(-7, 0)     | <b>0.019</b>             | 1<br>(-5, 6)                         | -4<br>(-9, 2)      | 1<br>(-4, 7)       | -4<br>(-9, 2)      | 2<br>(-3, 8)        | +1<br>(-3, 6)      | 0.223            | 0.093          |
| Peripheral, diastolic blood pressure (mmHg)                                            | 93         | 75<br>± 10                    | 74<br>± 9     | 1<br>(-1, 3)       | -2*<br>(-4, 0)     | <b>0.029</b>             | 0<br>(-3, 3)                         | -2<br>(-4, 1)      | -1<br>(-4, 2)      | -2<br>(-5, 1)      | 0<br>(-3, 3)        | 1<br>(-2, 4)       | 0.081            | 0.075          |
| <b>CARDIOVASCULAR RISK FACTORS - excluding medication adjustments #</b>                |            |                               |               |                    |                    |                          |                                      |                    |                    |                    |                     |                    |                  |                |
| Total cholesterol (mg/dL)                                                              | 88<br>/ 76 | 147<br>± 31                   | 147<br>± 31   | -4<br>(-12, 0)     | -4<br>(-8, 4)      | 0.931                    | -4<br>(-12, 8)                       | -4<br>(-12, 8)     | -4<br>(-12, 8)     | 0<br>(-12, 8)      | 4<br>(-8, 12)       | 8<br>(-4, 19)      | <b>0.001</b>     | 0.863          |
| LDL cholesterol (mg/dL)                                                                | 88<br>/ 76 | 77<br>± 27                    | 73<br>± 23    | -4<br>(-8, 0)      | -4<br>(-8, 4)      | 0.744                    | -4<br>(-12, 4)                       | -4<br>(-12, 4)     | -4<br>(-12, 4)     | 0<br>(-8, 8)       | 0<br>(-12, 8)       | 0<br>(-8, 12)      | 0.124            | 0.922          |
| HDL cholesterol (mg/dL)                                                                | 88<br>/ 76 | 50<br>± 12                    | 50<br>± 15    | 0<br>(0, 4)        | 0<br>(0, 4)        | 0.889                    | 4<br>(0, 4)                          | 0<br>(0, 4)        | 4<br>(0, 4)        | 4<br>(0, 8)        | 4*<br>(0, 8)        | 4*<br>(0, 8)       | <b>&lt;0.001</b> | 0.777          |

|                                                            |         |           |          |               |               |              |              |              |               |               |             |             |                  |       |
|------------------------------------------------------------|---------|-----------|----------|---------------|---------------|--------------|--------------|--------------|---------------|---------------|-------------|-------------|------------------|-------|
| Triglycerides (mg/dL)                                      | 88 / 76 | 124 ± 133 | 106 ± 53 | -9 (-35, 9)   | -9 (-27, 18)  | 0.667        | -18 (-35, 9) | -9 (-27, 18) | -9 (-35, 9)   | 0 (-27, 18)   | -9 (-35, 9) | 9 (-18, 27) | 0.265            | 0.695 |
| Resting heart rate (beats/min)                             | 83 / 78 | 57 ± 10   | 58 ± 8   | -3* (-4, -1)  | -1 (-3, 0)    | 0.734        | -3* (-6, -1) | -3 (-5, 0)   | -5* (-8, -2)  | -2 (-5, 0)    | -3* (-6, 0) | -3 (-5, 0)  | <b>&lt;0.001</b> | 0.312 |
| Peripheral, systolic blood pressure (mmHg)                 | 76 / 64 | 128 ± 13  | 129 ± 13 | 2 (-2, 6)     | -4* (-8, 0)   | <b>0.025</b> | 0 (-7, 7)    | -5 (-11, 1)  | 2 (-5, 8)     | -5 (-11, 1)   | 3 (-4, 10)  | -1 (-7, 5)  | 0.321            | 0.230 |
| Peripheral, diastolic blood pressure (mmHg)                | 76 / 64 | 75 ± 8    | 74 ± 9   | 1 (-1, 3)     | -1 (-3, 1)    | 0.068        | 0 (-4, 3)    | -1 (-4, 2)   | -1 (-4, 3)    | -2 (-5, 1)    | 1 (-3, 4)   | 1 (-1, 5)   | 0.210            | 0.272 |
| <b>CARDIOVASCULAR RISK FACTORS – hypertension subgroup</b> |         |           |          |               |               |              |              |              |               |               |             |             |                  |       |
| Peripheral, systolic blood pressure (mmHg)                 | 52      | 141 ± 10  | 138 ± 9  | -5* (-10, -1) | -6* (-10, -2) | 0.734        | -4 (-12, 4)  | -7 (-13, 0)  | -6 (-14, 2)   | -8* (-14, -1) | -8 (-16, 0) | -3 (-10, 3) | <b>0.001</b>     | 0.360 |
| Peripheral, diastolic blood pressure (mmHg)                | 52      | 82 ± 7    | 78 ± 10  | -2 (-5, 0)    | -2 (-4, 0)    | 0.953        | -2 (-7, 2)   | -2 (-6, 1)   | -7* (-11, -2) | -4 (-9, 0)    | -5 (-9, 0)  | -1 (-4, 3)  | <b>&lt;0.001</b> | 0.113 |

Baseline data results presented as mean ± standard deviation. Follow-up data results presented as mean change (95% confidence interval). P values are provided for group and time interaction effects after 4 weeks and 12 months and for time effects after 12 months. The symbol\* denotes significant difference from baseline.

HIIT - high intensity interval training; MICT – moderate intensity continuous training; LDL – low-density lipoprotein; HDL – high-density lipoprotein.

Sensitivity analyses were performed to account for medication adjustments, either including medications as covariates, #excluding participants with adjustments. For cardiorespiratory fitness variables involving heart rate, β-blocker adjustments were accounted for due to their effect on heart rate regulation and response. For cholesterol variables, statin and/or Ezetimibe adjustments were accounted for due to their effect on cholesterol metabolism. For blood pressure variables, angiotensin-converting enzyme inhibitors, angiotensin II receptor blockers, β-blockers, calcium channel blockers, and diuretics adjustments were accounted for due to their use in management of blood pressure.

Sensitivity analyses were also performed for a hypertension subgroup of participants. Hypertension was classified by resting systolic blood pressure > 130mmHg for at least two measurements.

SI conversion factors: To convert total cholesterol to millimoles per liter, multiply by 0.0259; LDL cholesterol to millimoles per liter, multiply by 0.0259; HDL cholesterol to millimoles per liter, multiply by 0.0259; triglycerides to millimoles per liter, multiply by 0.0113; fasting glucose to millimoles per liter, multiply by 0.0555.

**eTable 8.** Habitual physical activity and dietary intake

| Outcome Measures                                 | n  | Supervised Training (Stage 1) |               |                     |                     | Effect<br>Time*<br>Group | Home-based training (Stages 2 and 3) |                     |                    |                     |                     |                    | Effect           |                |
|--------------------------------------------------|----|-------------------------------|---------------|---------------------|---------------------|--------------------------|--------------------------------------|---------------------|--------------------|---------------------|---------------------|--------------------|------------------|----------------|
|                                                  |    | Baseline                      |               | Change in 4 weeks   |                     |                          | Change in 3 months                   |                     | Change in 6 months |                     | Change in 12 months |                    | Time             | Time*<br>Group |
|                                                  |    | HIIT                          | MICT          | HIIT                | MICT                |                          | HIIT                                 | MICT                | HIIT               | MICT                | HIIT                | MICT               |                  |                |
| <b>HABITUAL PHYSICAL ACTIVITY</b>                |    |                               |               |                     |                     |                          |                                      |                     |                    |                     |                     |                    |                  |                |
| Average daily MVPA (minutes)                     | 84 | 26<br>± 19                    | 31<br>± 23    | 6*<br>(0, 12)       | 0<br>(-6, 7)        | 0.193                    | 4<br>(-6, 14)                        | 4<br>(-5, 14)       | 6<br>(-3, 16)      | -2<br>(-12, 8)      | 9<br>(-2, 20)       | 2<br>(-8, 13)      | 0.262            | 0.232          |
| Average daily acceleration (mg)                  | 83 | 18.6<br>± 8.2                 | 18.4<br>± 7.5 | 2.6*<br>(1.2, 4.1)  | 1.4<br>(-0.1, 3.0)  | 0.262                    | 2.9*<br>(0.4, 5.4)                   | 2.2<br>(-0.2, 4.7)  | 2.8*<br>(0.3, 5.2) | 1.7<br>(-0.9, 4.3)  | 4.0*<br>(1.2, 6.7)  | 2.0<br>(-0.6, 4.7) | <b>&lt;0.001</b> | 0.559          |
| Minimum acceleration for most active 30 min (mg) | 83 | 130<br>± 51                   | 133<br>± 45   | 16*<br>(5, 26)      | 1<br>(-9, 13)       | 0.067                    | 9<br>(-15, 34)                       | 14<br>(-9, 38)      | 10<br>(-15, 34)    | 11<br>(-14, 36)     | 24<br>(-3, 51)      | 24<br>(-2, 50)     | <b>0.011</b>     | 0.409          |
| <b>HABITUAL DIETARY INTAKE</b>                   |    |                               |               |                     |                     |                          |                                      |                     |                    |                     |                     |                    |                  |                |
| Energy intake (MJ)                               | 91 | 8.6<br>± 2.2                  | 8.5<br>± 2.7  | -0.2<br>(-0.8, 0.5) | -0.4<br>(-1.1, 0.2) | 0.589                    | -0.2<br>(-1.1, 0.8)                  | -0.1<br>(-1.0, 0.8) | 0.2<br>(-0.8, 1.1) | -0.1<br>(-1.1, 0.8) | 0.1<br>(-0.8, 1.1)  | 0<br>(-0.9, 0.9)   | 0.443            | 0.913          |
| Protein (g)                                      | 91 | 94<br>± 26                    | 94<br>± 30    | 2<br>(-8, 12)       | -1<br>(-11, 9)      | 0.714                    | 5<br>(-9, 19)                        | -4<br>(-18, 10)     | 9<br>(-5, 23)      | -3<br>(-17, 10)     | 5<br>(-9, 19)       | 4<br>(-10, 18)     | 0.697            | 0.320          |
| Fat (g)                                          | 91 | 78<br>± 30                    | 82<br>± 33    | -3<br>(-12, 7)      | -9*<br>(-19, 0)     | 0.334                    | 3<br>(-10, 16)                       | -3<br>(-16, 10)     | 3<br>(-10, 16)     | -9<br>(-22, 4)      | 6<br>(-8, 19)       | -3<br>(-16, 10)    | 0.120            | 0.439          |
| Carbohydrate (g)                                 | 91 | 199<br>± 67                   | 197<br>± 76   | -14<br>(-32, 5)     | -10<br>(-28, 8)     | 0.795                    | -14<br>(-42, 15)                     | -6<br>(-35, 22)     | 5<br>(-24, 34)     | -5<br>(-34, 23)     | 9<br>(-21, 38)      | -13<br>(-41, 16)   | 0.275            | 0.295          |

Baseline results data presented as mean ± standard deviation. Follow-up data presented as mean change (95% confidence interval). P values are provided for group and time interaction effects after 4 weeks and 12 months and for time effects after 12 months. The symbol\* denotes significant difference from baseline. HIIT - high intensity interval training; MICT - moderate intensity continuous training; MVPA - moderate to vigorous physical activity
