# Supplementary material
Source: PubMed Central journal article supplement (PMC7489382)
Supplement: jamacardiol-e203511-s003.pdf [file jamacardiol-e203511-s003.pdf]

# Data Sharing Statement

Taylor. Short-term and Long-term Feasibility, Safety, and Efficacy of High-Intensity Interval Training in Cardiac Rehabilitation. *JAMA Cardiol.* Published September 02, 2020. 10.1001/jamacardio.2020.3511

## Data

**Data available:** Yes

**Data types:** Deidentified participant data

**How to access data:** Deidentified individual participant data that underlie the results reported in this article (text, tables, figures, and appendices) will be available for sharing immediately following publication with no end date. Any researchers who provide a methodologically sound proposal can access this data, to achieve the aims in this proposal or for individual participant data meta-analysis. Proposals should be directed to [jenna.taylor023@gmail.com](mailto:jenna.taylor023@gmail.com) or [jcoombes@uq.edu.au](mailto:jcoombes@uq.edu.au). Data requestors will need to sign a data access agreement to gain access. -

**When available:** With publication

## Supporting Documents

**Document types:** None

## Additional Information

**Who can access the data:** Any researchers who provide a methodologically sound proposal can access this data, to achieve the aims in this proposal or for individual participant data meta-analysis. Proposals should be directed to [jenna.taylor023@gmail.com](mailto:jenna.taylor023@gmail.com) or [jcoombes@uq.edu.au](mailto:jcoombes@uq.edu.au). Data requestors will need to sign a data access agreement to gain access.

**Types of analyses:** Any methodologically sound proposal or for individual participant data meta-analysis.

**Mechanisms of data availability:** Proposals should be directed to [jenna.taylor023@gmail.com](mailto:jenna.taylor023@gmail.com) or [jcoombes@uq.edu.au](mailto:jcoombes@uq.edu.au). Data requestors will need to sign a data access agreement to gain access.
